# Supplementary material for: Restriction of the rotational relaxation of a butadiyne-bridged porphyrin dimer in ultrathin films
Source: Royal Society of Chemistry journal article supplement (doi:10.1039/c9nj01807g), 2019-01-01
Supplement: c9nj01807g1.pdf [file c9nj01807g1.pdf]

## Supporting Information

### Restriction of rotational relaxation of the butadiyne-bridged porphyrin dimer in ultrathin films

Alexander V. Shokurov,<sup>a\*</sup> Ivan N. Meshkov,<sup>a</sup> Véronique Bulach,<sup>b</sup> Yulia G. Gorbunova,<sup>a,c</sup>  
Mir Wais Hosseini,<sup>b</sup> Aslan Yu. Tsivadze,<sup>a,c</sup> Vladimir V. Arslanov<sup>a</sup> and Sofia L. Selektor<sup>a</sup>

<sup>a</sup> Frumkin Institute of Physical Chemistry and Electrochemistry, Russian Academy of Sciences, Leninsky pr. 31-4, Moscow, 119071 Russia

<sup>b</sup> Molecular Tectonics Laboratory, UMR UDS-CNRS, 7140 & icFRC, Université de Strasbourg, F-67000, Strasbourg, France

<sup>c</sup> Kurnakov Institute of General and Inorganic Chemistry, Russian Academy of Sciences, Leninsky pr. 31, Moscow, 119991 Russia

email: [shokurov@phych.ea.ru](mailto:shokurov@phych.ea.ru)

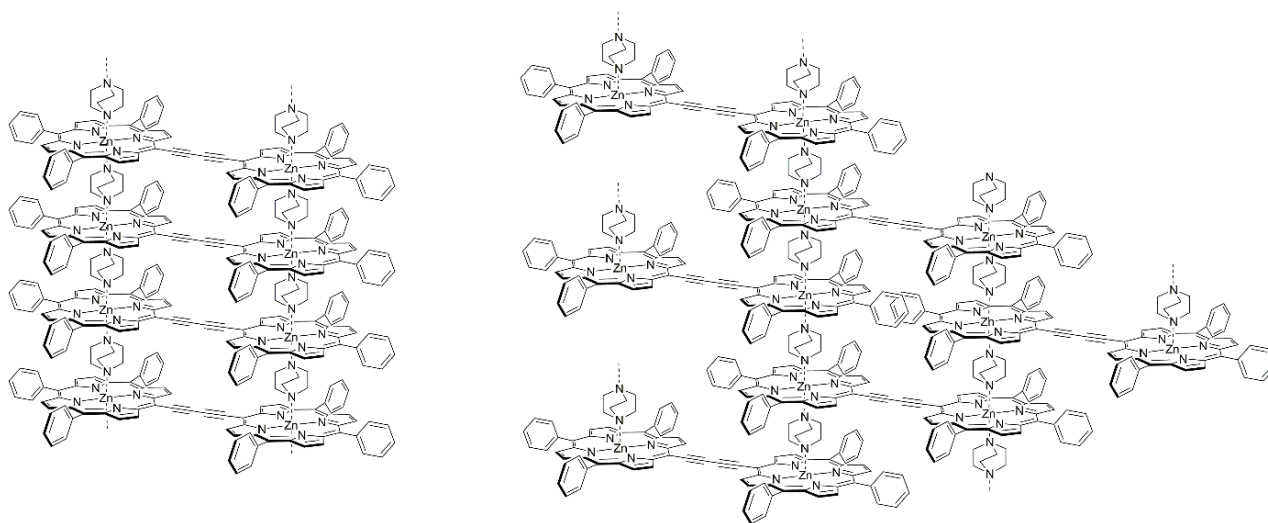

**Scheme S1** The proposed structures of the **D-DABCO** ladder-like and branched-like packings in the LBF forming from the solution of **D** in the presence of 45 equiv **DABCO**.

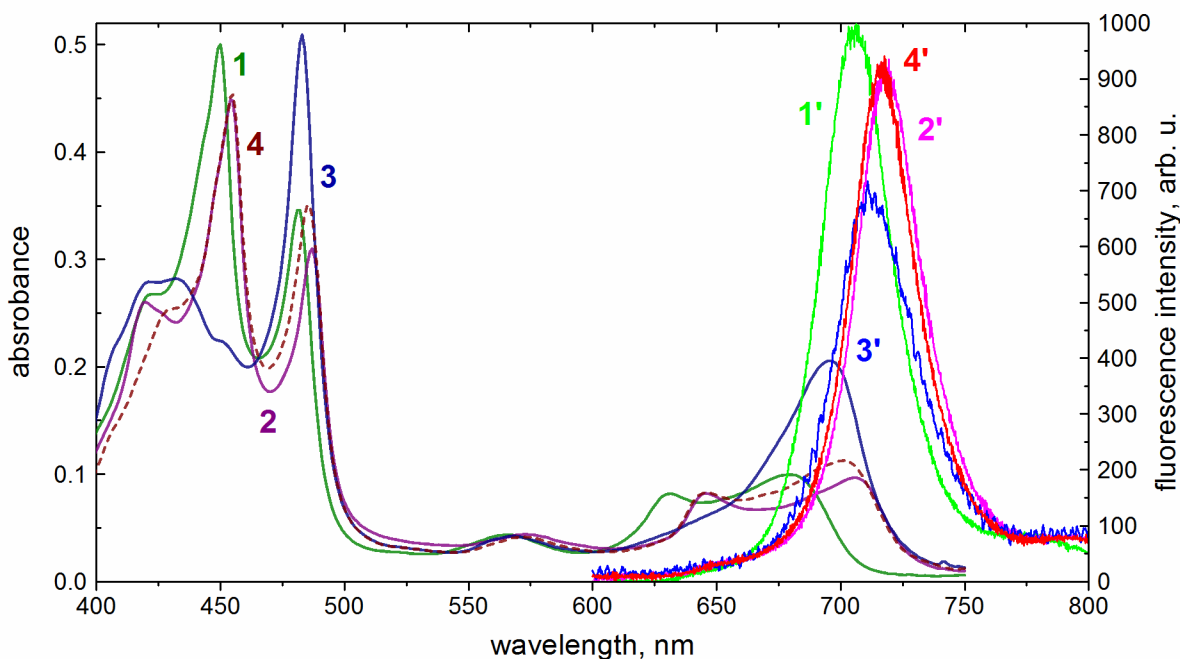

**Figure S1** Comparison of UV-Vis spectra in  $\text{CHCl}_3$  of the following **D** dimer solutions ( $c = 1.6 \times 10^{-6} \text{ M}$ ) in chloroform: (1) 1% vol of dioxane, (2) 1% vol of AMP, (3) 2 equiv of DABCO, (4) 45 equiv of DABCO, and (1'-4') their respective emission spectra upon excitation at  $\lambda = 450 \text{ nm}$  (divided by absorbance at the same wavelength).

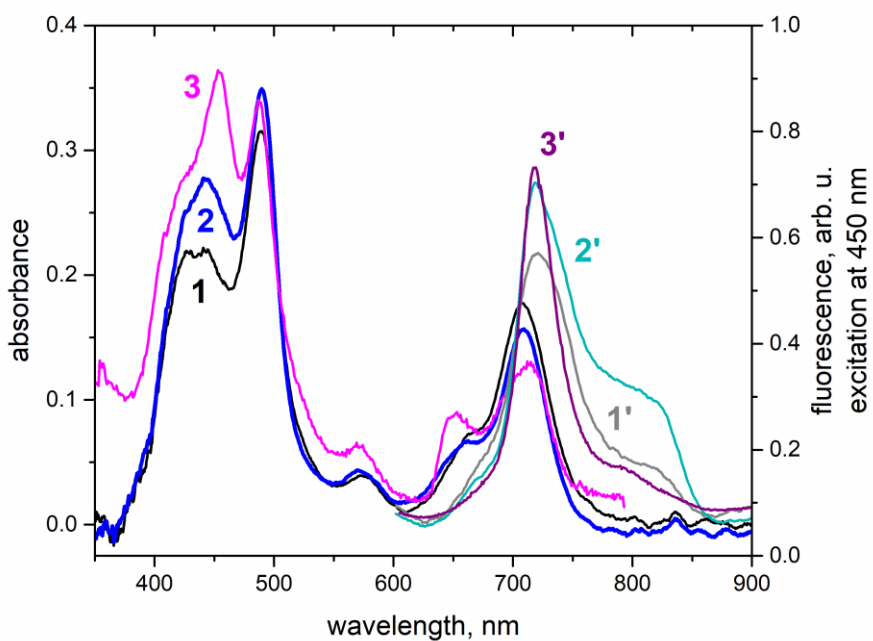

**Figure S2.** UV-Vis absorbance spectra of cast films of (1) **D**-2DABCO and (2) **D**-45DABCO, (3) **D**-AMP, and (1'-3') their respective emission spectra upon excitation at  $\lambda = 450 \text{ nm}$ .

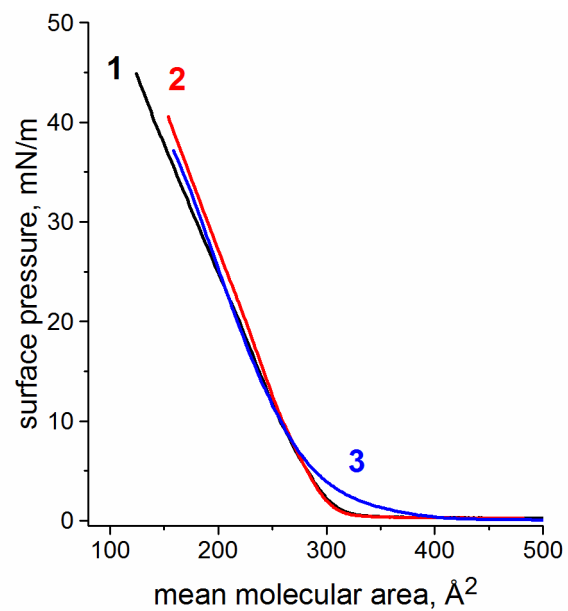

**Figure S3.** Compression isotherms of **D**-AMP monolayers formed from solutions containing (1) 1% vol, (2) 5% vol, and (3) 10% vol of AMP.
